# Supplementary material
Source: PubMed Central journal article supplement (PMC2981365)
Supplement: supp_mol.110.066258_Supplemental_Figure_1.pdf [file supp_mol.110.066258_Supplemental_Figure_1.pdf]

Lyn Kinase-dependent Regulation of miR181 and Mcl-1 Expression: Implications for Drug Resistance in Myelogenous Leukemia

Eric I. Zimmerman, Claudia M. Dollins, Melissa Crawford, Steven Grant, Serge P. Nana-Sinkam, Kristy L. Richards, Scott M. Hammond, and Lee M. Graves

*Mol Pharm*

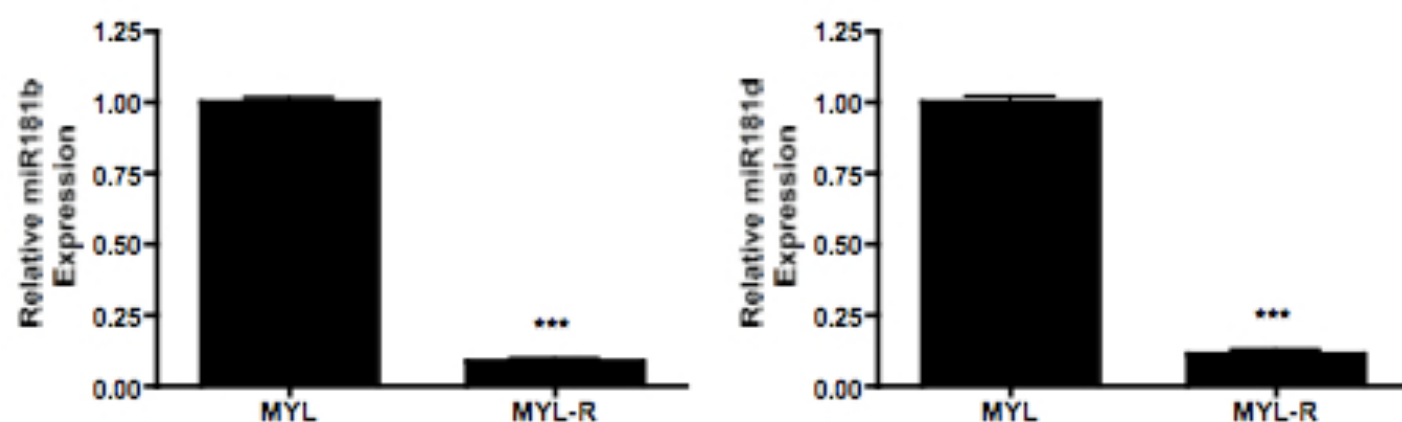

**Supplemental Figure 1: Quantitative RT-PCR of miR181b and miR181d.** Total RNA was extracted from  $2 \times 10^6$  cells and miRNA expression was determined by qRT-PCR. Data represent the mean  $\pm$  SEM of triplicate experiments performed with triplicate samples (\*\*\*,  $p < 0.001$ ).
